# Supplementary material for: Comprehensive Time-Course Effects of Combined Training on Hypertensive Older Adults: A Randomized Control Trial
Source: MDPI journal article supplement (doi:10.3390/ijerph191711042), 2022-09-04
Supplement: s1 [file s1]

## Supplementary material

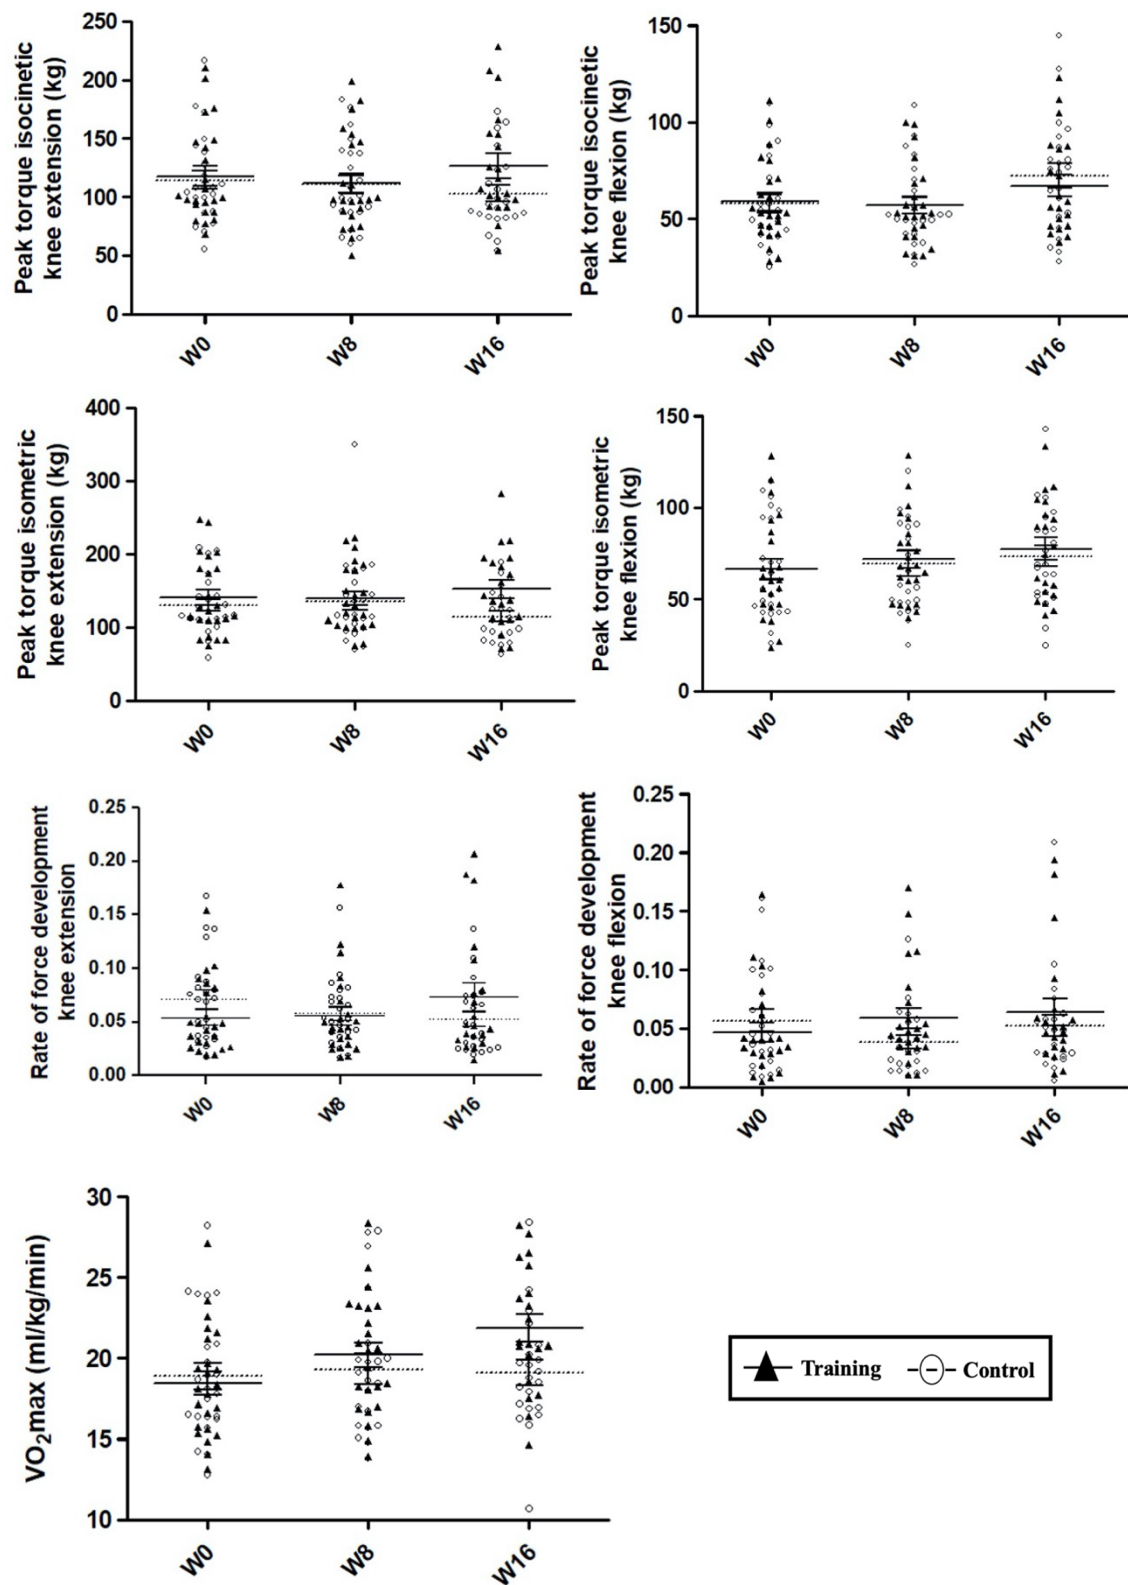

**Figure S1a.** Individual data, median and interquartile range for Physical fitness: Muscle strength and maximum oxygen consumption.

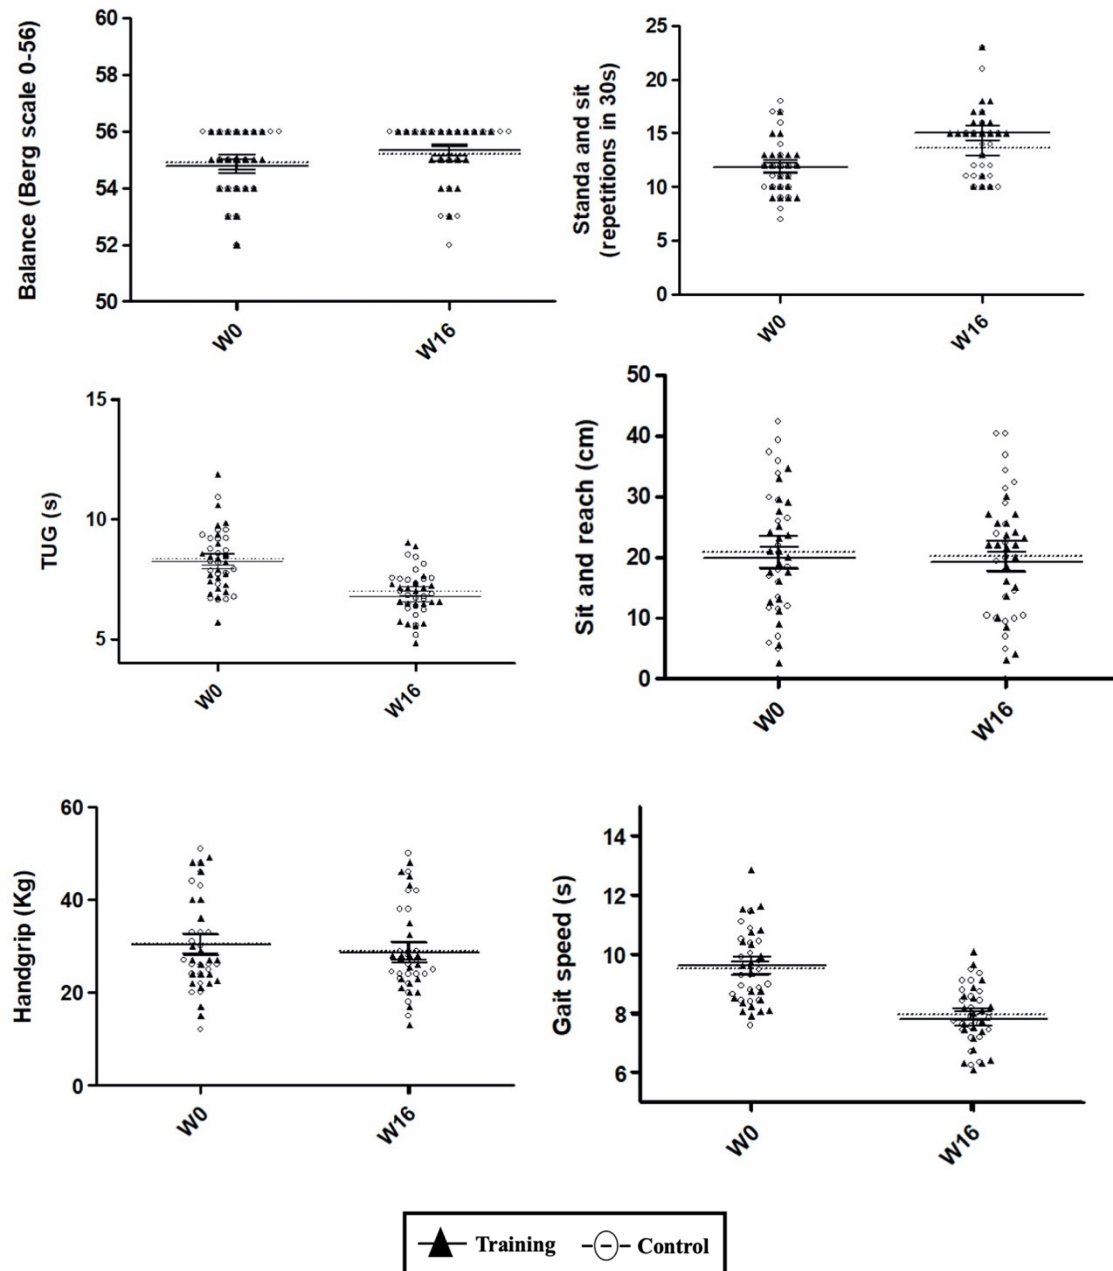

**Figure S1b.** Individual data, median and interquartile range for Physical fitness: Functionality.

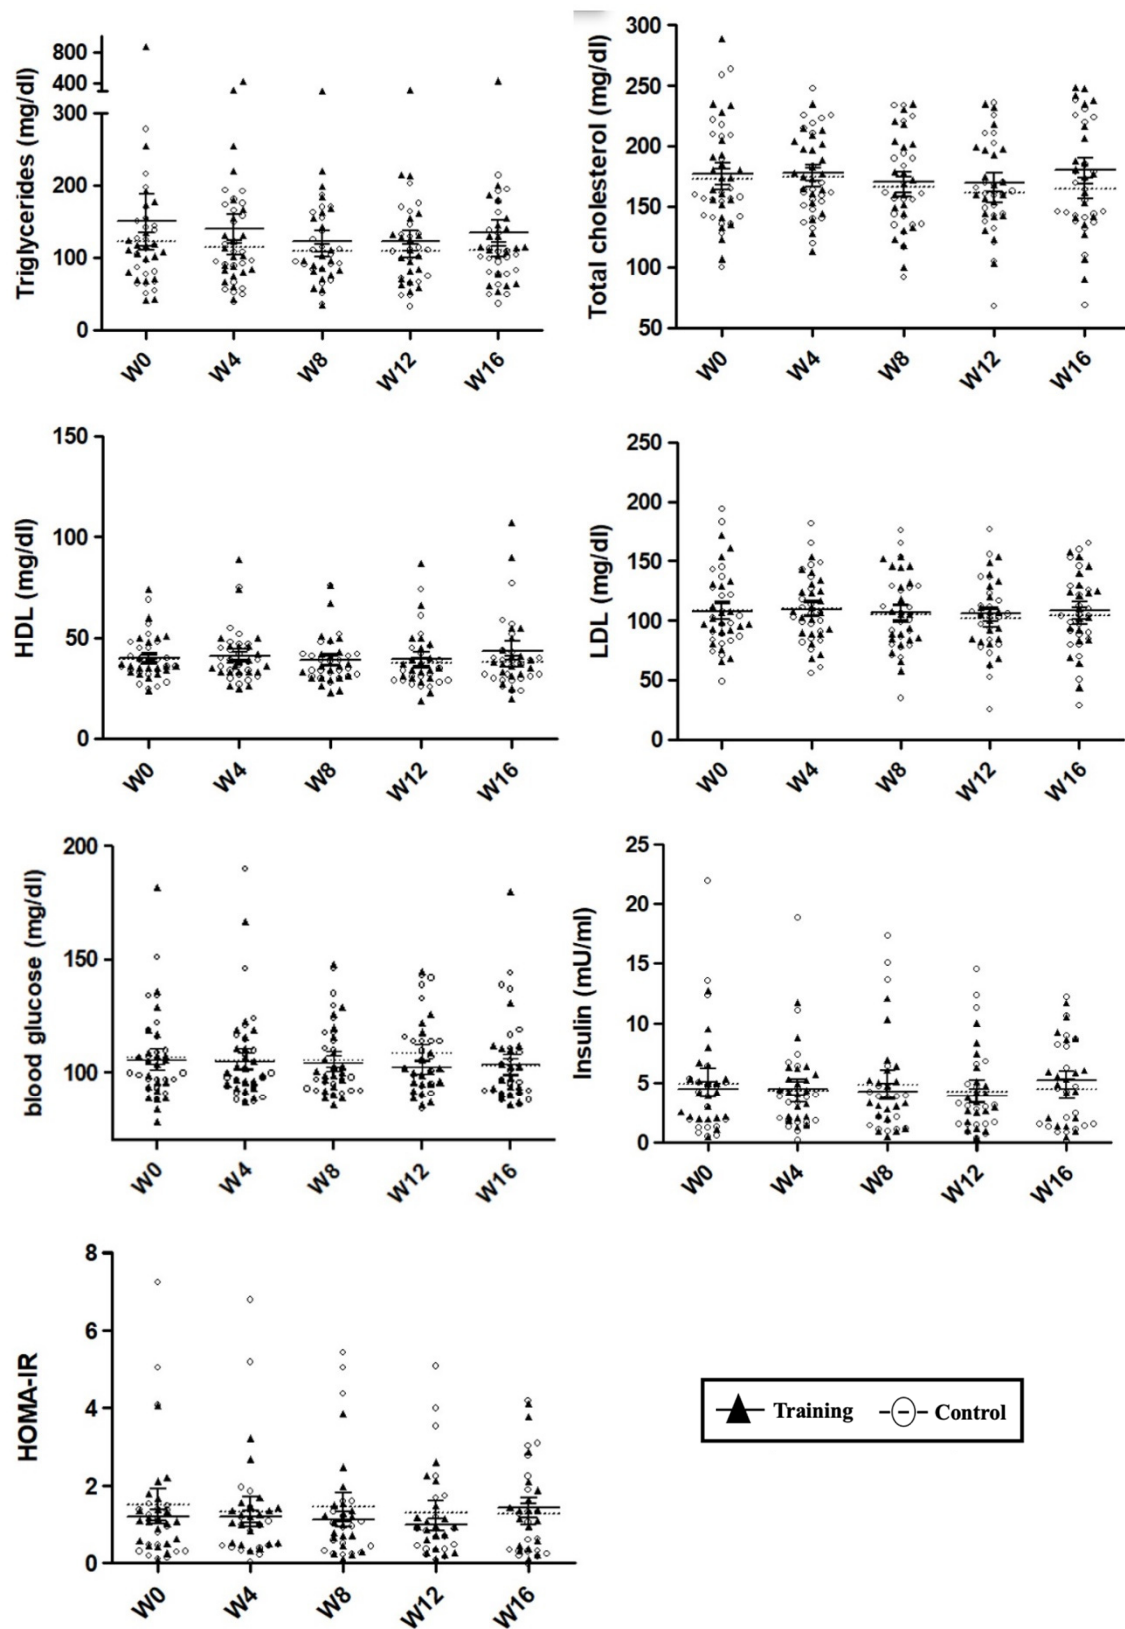

**Figure S2a.** Individual data, median and interquartile range for Blood markers: Glycemic and Lipidic profile.

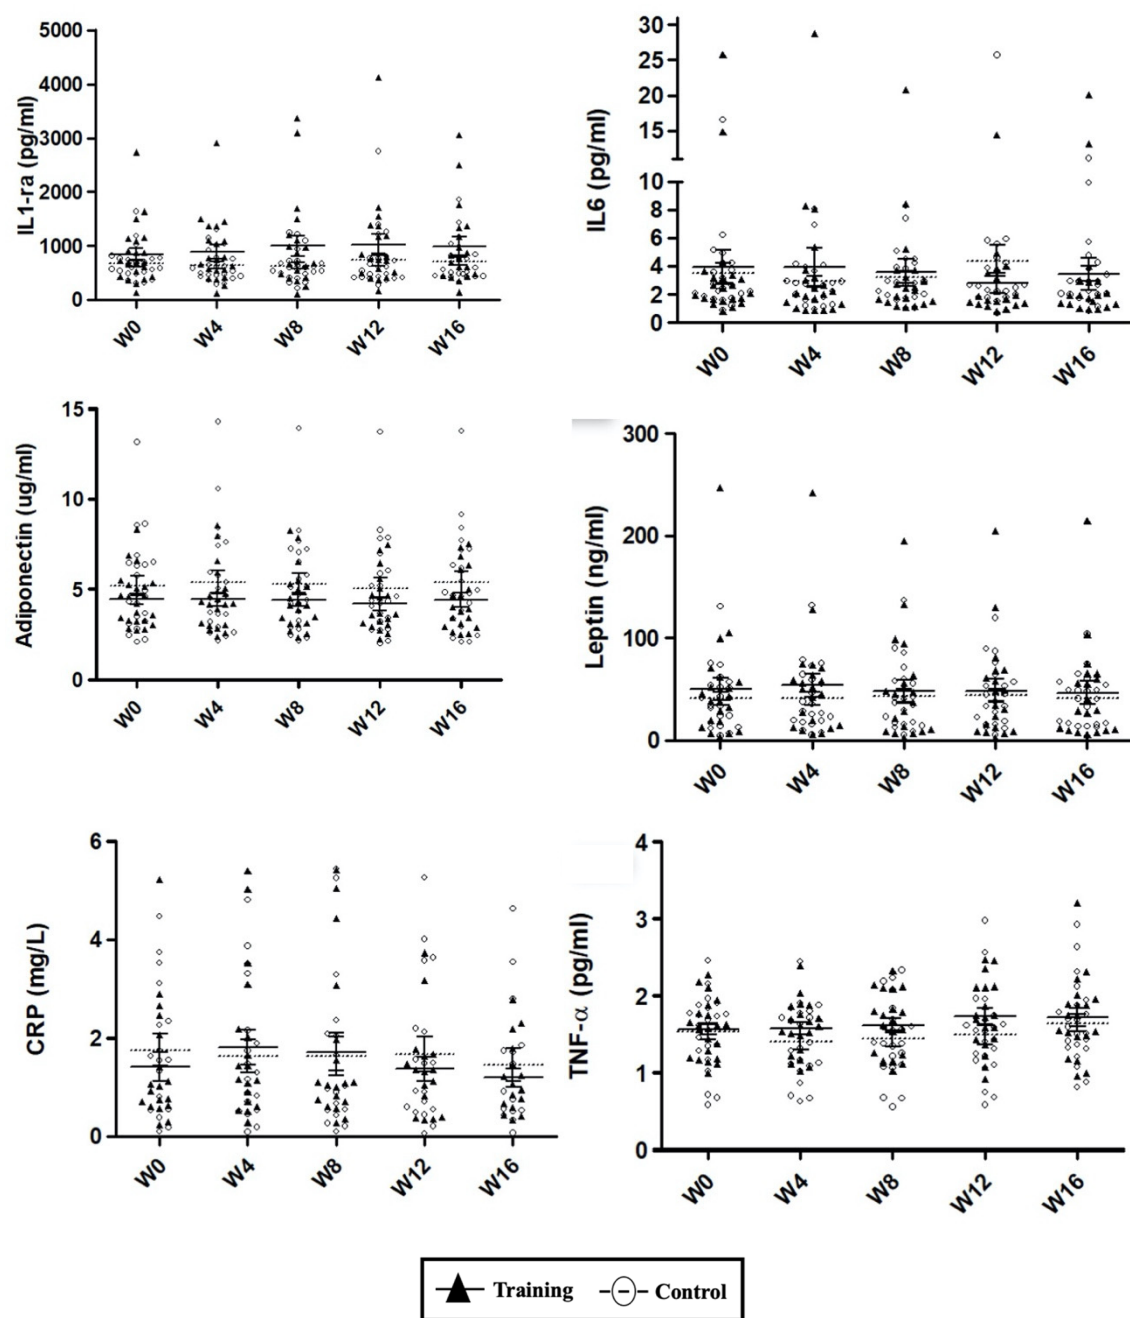

**Figure S2b.** Individual data, median and interquartile range for Blood markers: Inflammatory profile.

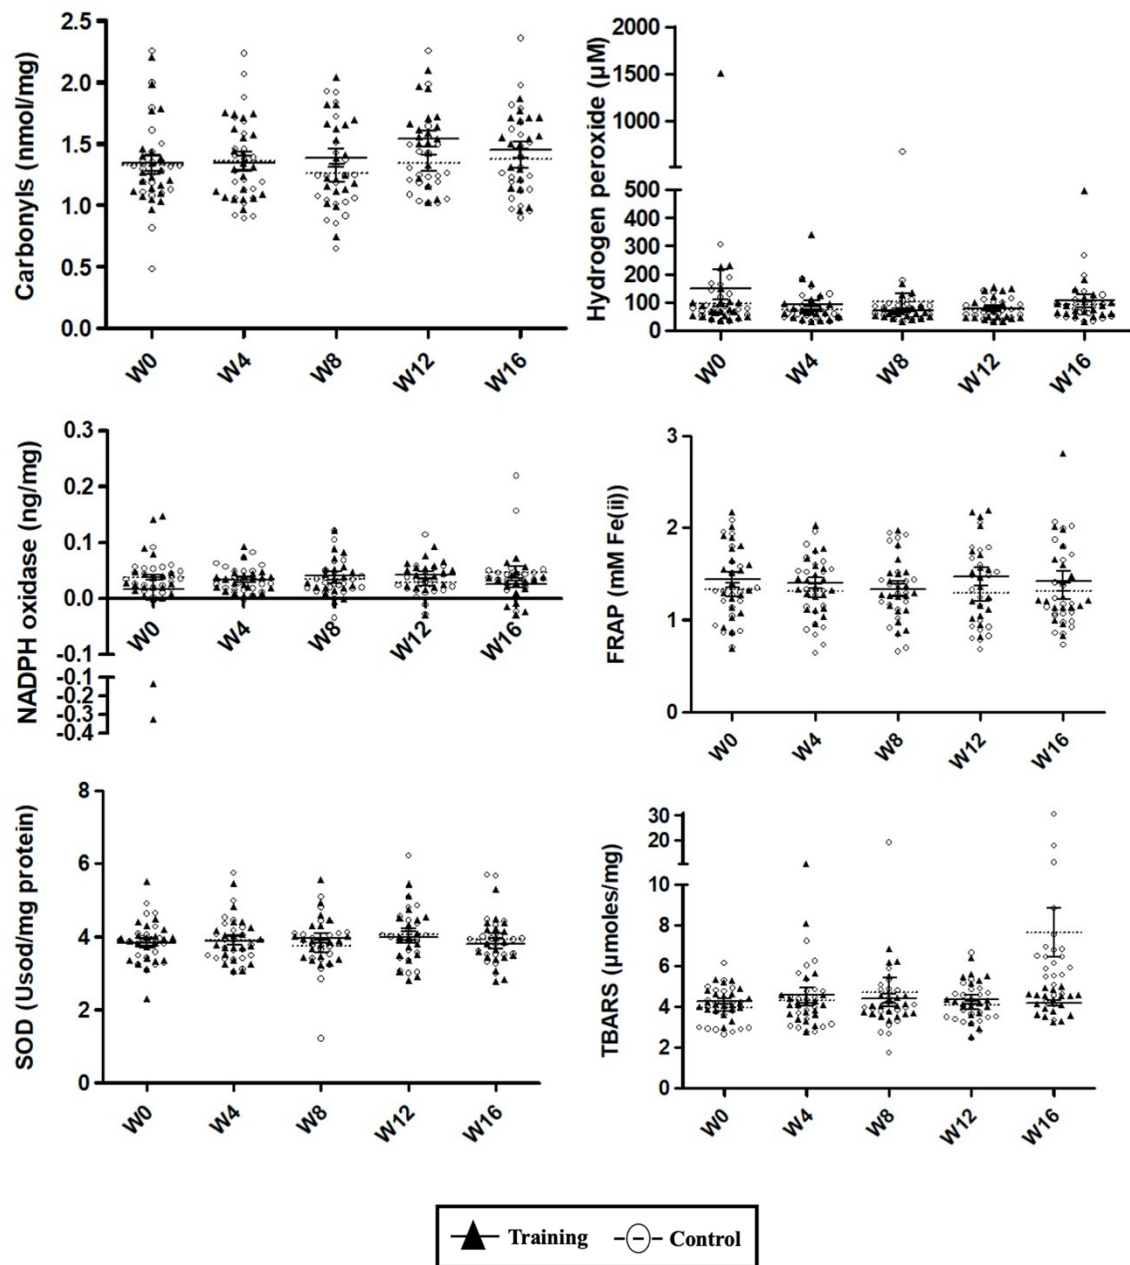

**Figure S2c.** Individual data, median and interquartile range for Blood markers: Oxidative stress profile.

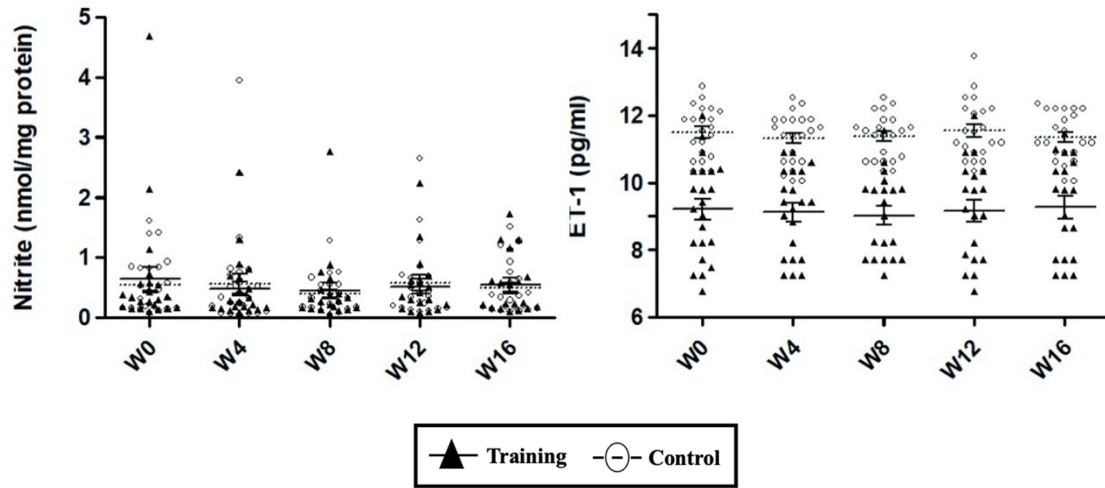

**Figure S2d.** Individual data, median and interquartile range for Blood markers: vasoactive substances.

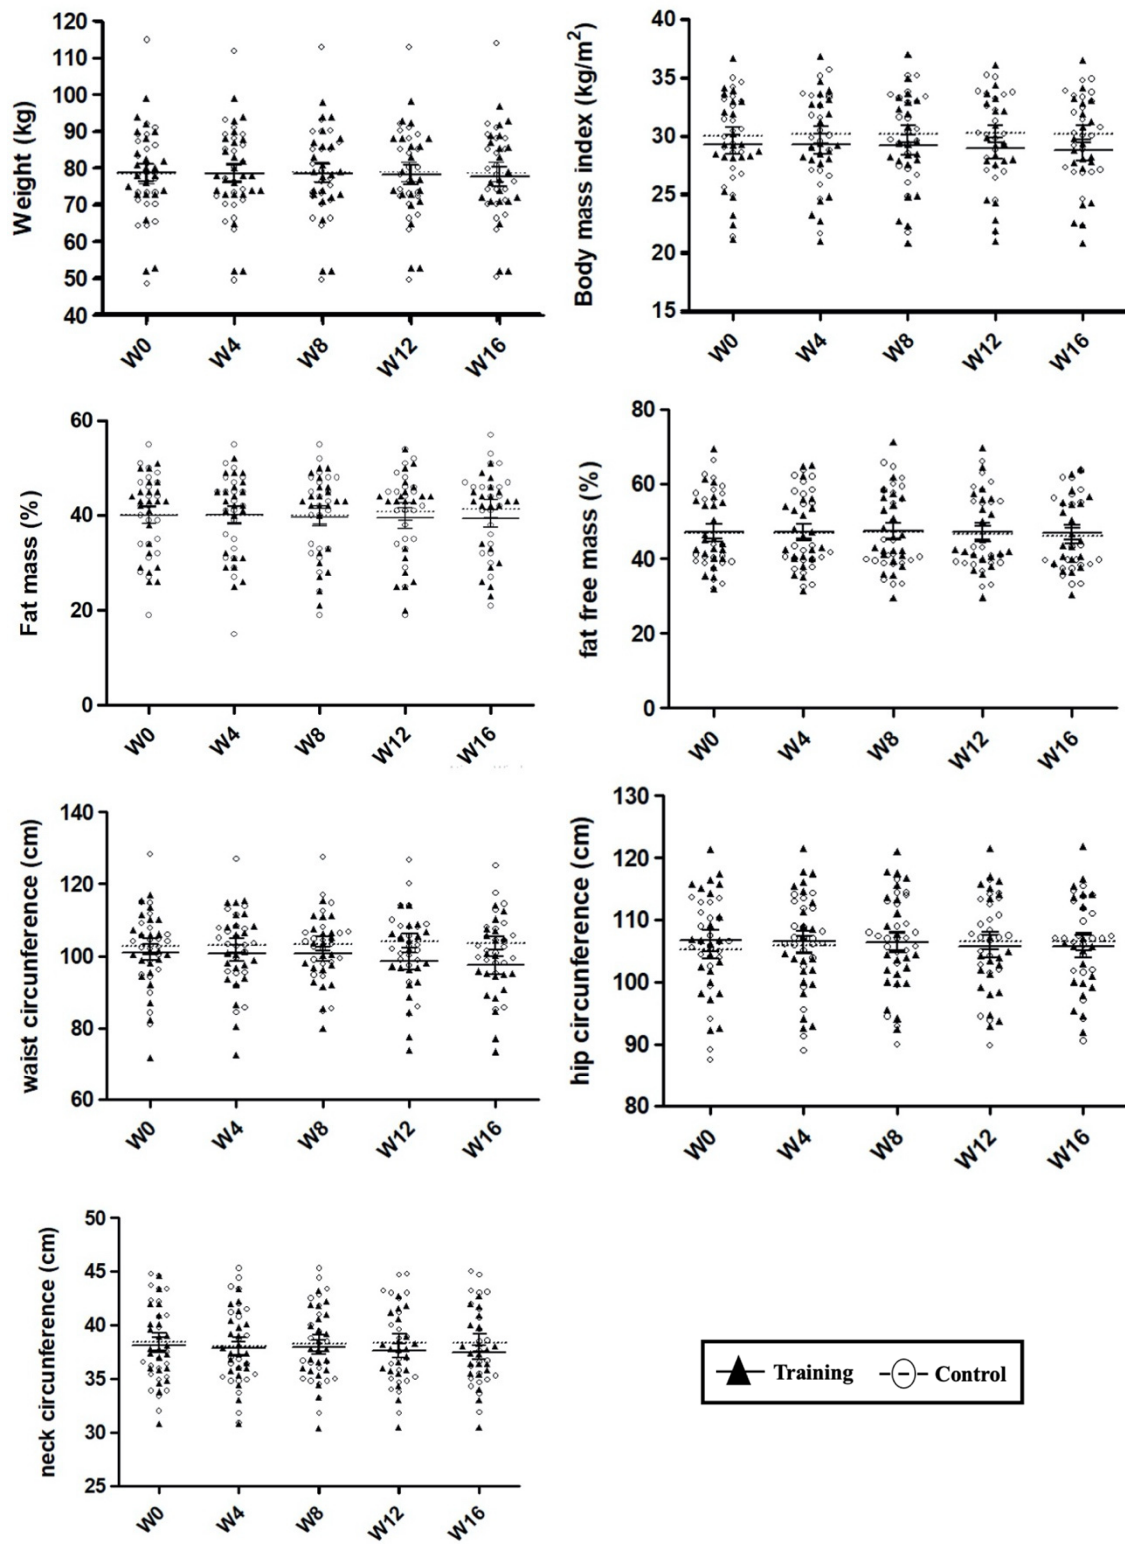

**Figure S3a.** Individual data, median and interquartile range for Cardiometabolic profile: Body composition.



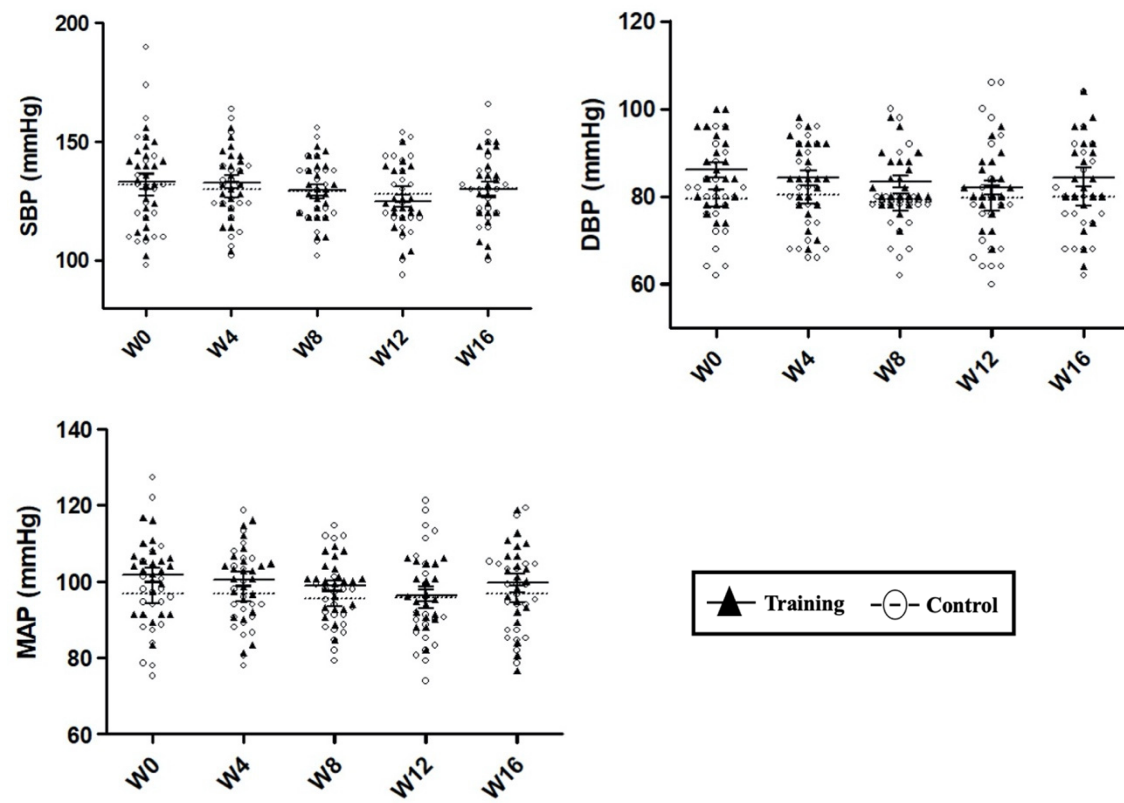

**Figure S3b.** Individual data, median and interquartile range for Cardiometabolic profile: Cardiovascular function.



**Table S1.** ANOVA 2 way for repeated measures at W0 and at W16.

|                                                     | Within subjects Effects: group*time interaction | Pairwise comparison (P-Value) |
|-----------------------------------------------------|-------------------------------------------------|-------------------------------|
| <b>Body composition</b>                             |                                                 |                               |
| Body Mass (kg)                                      | F (1, 42) = 6.2, P = 0.017, $\eta_p^2 = 0.13$   | 0.231                         |
| BMI (kg/m <sup>2</sup> )                            | F (1, 42) = 6.52, P = 0.014, $\eta_p^2 = 0.13$  | 0.32                          |
| Fat mass (%) [NN]                                   | F (1, 42) = 1.11, P = 0.298, $\eta_p^2 = 0.03$  | 0.303                         |
| Fat free mass (%) [NN]                              | F (1, 42) = 1.09, P = 0.303, $\eta_p^2 = 0.03$  | 0.299                         |
| VL thickness (cm)                                   | F (1, 40) = 1.17, P = 0.286, $\eta_p^2 = 0.03$  | 0.091                         |
| RF thickness (cm)                                   | F (1, 41) = 3.66, P = 0.063, $\eta_p^2 = 0.08$  | 0.557                         |
| Neck circumference (cm)                             | F (1, 42) = 3.51, P = 0.068, $\eta_p^2 = 0.08$  | 0.018                         |
| Waist circumference (cm)                            | F (1, 42) = 24.25, P < 0.001, $\eta_p^2 = 0.37$ | 0.011                         |
| Hip circumference (cm)                              | F (1, 42) = 8.15, P = 0.007, $\eta_p^2 = 0.16$  | 0.502                         |
| <b>Cardiovascular function</b>                      |                                                 |                               |
| SBP (mmHg)                                          | F (1, 42) = 0.07, P = 0.797, $\eta_p^2 = 0$     | 0.364                         |
| DBP (mmHg) [Log]                                    | F (1, 42) = 0.51, P = 0.477, $\eta_p^2 = 0.01$  | 0.676                         |
| MAP (mmHg)                                          | F (1, 42) = 0.35, P = 0.56, $\eta_p^2 = 0.01$   | 0.487                         |
| ABI [Log]                                           | F (1, 41) = 3.95, P = 0.054, $\eta_p^2 = 0.09$  | 0.025                         |
| SV (ml) P = 0.90                                    | F (1, 36) = 0.31, P = 0.583, $\eta_p^2 = 0.01$  | 0.347                         |
| CO (L/min) P = 0.90                                 | F (1, 36) = 1.78, P = 0.191, $\eta_p^2 = 0.05$  | 0.784                         |
| TPR (mmHg/min/l) [Log] P = 0.90                     | F (1, 36) = 3.22, P = 0.081, $\eta_p^2 = 0.08$  | 0.647                         |
| IMT (mm)                                            | F (1, 25) = 1.29, P = 0.267, $\eta_p^2 = 0.05$  | 0.254                         |
| CC (%/10mmHg) [OR NN]                               | F (1, 18) = 5.14, P = 0.036, $\eta_p^2 = 0.22$  | 0.665                         |
| <b>Physical fitness.</b>                            |                                                 |                               |
| Isokinetic peak torque of knee extension (Kg) [Log] | F (1, 40) = 12.47, P = 0.001, $\eta_p^2 = 0.24$ | 0.015                         |
| Isokinetic peak torque of knee flexion (Kg) [Log]   | F (1, 40) = 2.88, P = 0.097, $\eta_p^2 = 0.07$  | P < 0.001                     |
| Isometric peak torque of knee extension (Kg) [Log]  | F (1, 40) = 12.36, P = 0.001, $\eta_p^2 = 0.24$ | 0.111                         |
| Isometric peak torque of knee flexion (Kg) [SqR]    | F (1, 40) = 0.08, P = 0.774, $\eta_p^2 = 0$     | 0.01                          |
| Rate of force development of knee extension [Log]   | F (1, 40) = 16.5, P < 0.001, $\eta_p^2 = 0.29$  | 0.259                         |
| Rate of force development of knee flexion [Log]     | F (1, 39) = 1.31, P = 0.26, $\eta_p^2 = 0.03$   | 0.447                         |
| VO <sub>2</sub> max (ml/kg/min)                     | F (1, 39) = 11.23, P = 0.002, $\eta_p^2 = 0.22$ | P < 0.001                     |
| Maximal speed (km/h)                                | F (1, 39) = 42.03, P < 0.001, $\eta_p^2 = 0.52$ | P < 0.001                     |
| Balance (Berg Scale) [NN]                           | F (1, 40) = 0.48, P = 0.492, $\eta_p^2 = 0.01$  | 0.072                         |
| Sit and reach (cm)                                  | F (1, 40) = 0.29, P = 0.591, $\eta_p^2 = 0.01$  | 0.876                         |
| Stand and sit (repetitions in 30s) [Log]            | F (1, 40) = 2.75, P = 0.105, $\eta_p^2 = 0.06$  | P < 0.001                     |
| Handgrip strength (Kg) [Log]                        | F (1, 40) = 0.02, P = 0.875, $\eta_p^2 = 0$     | 0.098                         |
| Timed up and go (s)                                 | F (1, 40) = 0.23, P = 0.631, $\eta_p^2 = 0.01$  | P < 0.001                     |
| Gait speed (s)                                      | F (1, 40) = 0.59, P = 0.447, $\eta_p^2 = 0.01$  | P < 0.001                     |
| <b>Blood markers.</b>                               |                                                 |                               |
| <b>Glycemic and Lipidic profile</b>                 |                                                 |                               |
| Blood glucose (mg/dl) [NN]                          | F (1, 40) = 0.51, P = 0.478, $\eta_p^2 = 0.01$  | 0.118                         |
| Insulin (um/ml) [Log]                               | F (1, 36) = 1.86, P = 0.181, $\eta_p^2 = 0.05$  | 0.73                          |
| HOMA-IR [NN]                                        | F (1, 34) = 1.19, P = 0.284, $\eta_p^2 = 0.03$  | 0.708                         |
| Triglycerides (mg/dl) [Log]                         | F (1, 40) = 2.47, P = 0.124, $\eta_p^2 = 0.06$  | 0.78                          |
| Total cholesterol (mg/dl) [SqR]                     | F (1, 40) = 1.57, P = 0.218, $\eta_p^2 = 0.04$  | 0.786                         |

|                                                      |                                              |       |
|------------------------------------------------------|----------------------------------------------|-------|
| HDL (mg/dl) [Log]                                    | F (1, 41) = 3.84, P = 0.057, $\eta^2$ = 0.09 | 0.303 |
| LDL (mg/dl)                                          | F (1, 40) = 0.6, P = 0.444, $\eta^2$ = 0.01  | 0.726 |
| Inflammatory profile                                 |                                              |       |
| IL-6 (pg/ml) [NN]                                    | F (1, 39) = 0.54, P = 0.469, $\eta^2$ = 0.01 | 0.841 |
| IL-1ra (pg/ml) [Log]                                 | F (1, 39) = 0.07, P = 0.797, $\eta^2$ = 0    | 0.297 |
| TNF- $\alpha$ (pg/ml)                                | F (1, 39) = 0, P = 0.975, $\eta^2$ = 0       | 0.498 |
| PCR (mg/L) [Log]                                     | F (1, 27) = 0.1, P = 0.755, $\eta^2$ = 0     | 0.772 |
| Adiponectin (ug/ml) [Log]                            | F (1, 39) = 0.78, P = 0.383, $\eta^2$ = 0.02 | 0.791 |
| Leptin (ng/ml) [Log]                                 | F (1, 39) = 0.32, P = 0.574, $\eta^2$ = 0.01 | 0.986 |
| Oxidative stress profile                             |                                              |       |
| Carbonils (nmol/mg) [Log]                            | F (1, 40) = 0.49, P = 0.488, $\eta^2$ = 0.01 | 0.062 |
| Hydrogen peroxide ( $\mu$ M) [NN]                    | F (1, 40) = 0.73, P = 0.398, $\eta^2$ = 0.02 | 0.315 |
| NADPH oxidase (ng/mg) [SqR]                          | F (1, 33) = 1.06, P = 0.31, $\eta^2$ = 0.03  | 0.981 |
| FRAP (mM Fe(ii) [Log]                                | F (1, 40) = 0.16, P = 0.689, $\eta^2$ = 0    | 0.411 |
| SOD (Uso/dmg protein)                                | F (1, 40) = 0.22, P = 0.64, $\eta^2$ = 0.01  | 0.575 |
| Vasoactive substances                                |                                              |       |
| ET-1 (pg/ml) [SqR]                                   | F (1, 39) = 0.27, P = 0.608, $\eta^2$ = 0.01 | 0.142 |
| Nitrite (nmol/mg protein) [Log]                      | F (1, 40) = 0.15, P = 0.696, $\eta^2$ = 0    | 0.802 |
| Heart rate variability indexes: Time domain.         |                                              |       |
| FC (bpm)                                             | F (1, 40) = 0.71, P = 0.406, $\eta^2$ = 0.02 | 0.969 |
| RRi (ms) [Log]                                       | F (1, 40) = 0.62, P = 0.436, $\eta^2$ = 0.02 | 0.956 |
| SDNN (ms) [NN]                                       | F (1, 40) = 0.33, P = 0.572, $\eta^2$ = 0.01 | 0.658 |
| RMSSD (ms) [Log]                                     | F (1, 40) = 0.12, P = 0.733, $\eta^2$ = 0    | 0.721 |
| pNN50 (%) [Log]                                      | F (1, 29) = 0.21, P = 0.65, $\eta^2$ = 0.01  | 0.364 |
| Heart rate variability indexes: Frequency domain     |                                              |       |
| HF (ms <sup>2</sup> ) [Log]                          | F (1, 40) = 0, P = 0.983, $\eta^2$ = 0       | 0.67  |
| LF (ms <sup>2</sup> ) [Log]                          | F (1, 40) = 0, P = 0.968, $\eta^2$ = 0       | 0.927 |
| TP [NN]                                              | F (1, 40) = 0.18, P = 0.671, $\eta^2$ = 0    | 0.954 |
| LF/HF [Log]                                          | F (1, 40) = 0.52, P = 0.475, $\eta^2$ = 0.01 | 0.429 |
| HF (nu)                                              | F (1, 40) = 0.17, P = 0.683, $\eta^2$ = 0    | 0.785 |
| LF (nu)                                              | F (1, 40) = 0.33, P = 0.571, $\eta^2$ = 0.01 | 0.686 |
| Heart rate variability indexes: Non-linear analysis. |                                              |       |
| SD1 [Log]                                            | F (1, 40) = 0.43, P = 0.516, $\eta^2$ = 0.01 | 0.508 |
| SD2 [NN]                                             | F (1, 40) = 1.13, P = 0.294, $\eta^2$ = 0.03 | 0.894 |

**Legend:** BMI: body mass index VL: vastus lateralis; RF: rectus femoris; SBP: systolic blood pressure; DBP: diastolic blood pressure; MAP: mean blood pressure; ABI: ankle-brachial index; SV: stroke volume; CO: cardiac output; TPR: total peripheral resistance; IMT: intima media thickness; CC: carotid compliance. [Log]: [SqR]: Analysis of square root transformed data; Analysis of log transformed data; [NN] Analysis of non-normally distributed data; [OR]: analysis with outliers removed; HDL: High density lipoprotein; LDL: Low density lipoprotein; IL-1ra: interleukin 1 receptor antagonist; IL-6: interleukin 6; TNF- $\alpha$ : Tumor necrosis factor alpha; CRP: C-reactive protein; TBARS: Thiobarbituric acid reactive substances; NASDH: nicotinamide adenine dinucleotide phosphate oxidase; FRAP: Ferric Reduction Ability Power; SOD: superoxide dismutase; ET-1: endothelin-1; HR: heart rate; RRi: R–R interval; SDNN: standard deviation of all normal R–R intervals; RMSSD: square root of the mean squared differences of successive R–R intervals; pNN50: Percentage of successive RR intervals that differ by more than 50 ms; HF: high frequency; LF: low frequency; VLF: very low frequency; TP: total power; LF/HF: ratio between the bands of low and high frequencies; SD1: Poincaré plot standard deviation perpendicular the line of identity; SD2: Poincaré plot standard deviation along the line of identity.
